# Supplementary material for: Nuclear poly(A) tail size is regulated by Cnot1 during the serum response
Source: bioRxiv or medRxiv preprint supplement (doi:10.1101/773432), 2019-09-19
Supplement: Supplementary file [file media-2.pdf]

# Supplementary tables

## **Nuclear poly(A) tail size is regulated by Cnot1 during the serum response**

Richa Singhania<sup>#§</sup>, Graeme J. Thorn<sup>#&</sup>, Kathryn Williams, Raj D. Gandhi, Clara Daher, Adeline Barthelet-Barateig, Hannah N. Parker, Wahyu Utami, Mustafa Al-Siraj, David A. Barrett, Jonathan A.D. Wattis<sup>1</sup> and Cornelia H. de Moor<sup>\*</sup>

Supplementary Table 1.1

|            | Immediate decay model best fit parameters |          |          |           |            |          |
|------------|-------------------------------------------|----------|----------|-----------|------------|----------|
|            | alpha                                     | lambda   | epsilon  | RSS       | Transcript | lifetime |
| Arc STC1   | 1.291023                                  | 0.035008 | 6.695178 | 7945.3278 | 5525.837   | 28.56508 |
| Arc STC2   | 1.207656                                  | 0.039539 | 6.695178 | 8635.1449 | 4132.223   | 25.29126 |
| Btg2 STC1  | 0.450648                                  | 0.049465 | 0.191004 | 7027764.4 | 3544.749   | 20.21625 |
| Btg2 STC2  | 0.588605                                  | 0.06568  | 0.191004 | 7850049.1 | 5246.837   | 15.2253  |
| Ccrn4l STC | 39.93553                                  | 0.020187 | 86.27389 | 246897.12 | 374040.5   | 49.53792 |
| Ccrn4l STC | 33.82768                                  | 0.018689 | 86.27389 | 570373.06 | 310707.6   | 53.50787 |
| Csrnp1 STC | 4.957353                                  | 0.067725 | 32.6063  | 6284.622  | 23064.42   | 14.76549 |
| Csrnp1 STC | 5.899285                                  | 0.086629 | 32.6063  | 2516.4594 | 22820.85   | 11.54345 |
| Ctgf STC1  | 0.677385                                  | 0.012761 | 99.99997 | 34127.931 | 71809.33   | 78.36162 |
| Ctgf STC2  | 0.43727                                   | 0.009608 | 99.99997 | 15653.275 | 49614.86   | 104.0766 |
| Cyr61 STC  | 2.92945                                   | 0.045395 | 1.341972 | 297858215 | 165227.2   | 22.02877 |
| Cyr61 STC  | 1.986544                                  | 0.039344 | 1.341972 | 195030933 | 118972.3   | 25.4169  |
| Dusp1 STC  | 12.26347                                  | 0.110618 | 19.97353 | 19663384  | 1338433    | 9.040152 |
| Dusp1 STC  | 12.1942                                   | 0.118817 | 19.97353 | 50476493  | 1680406    | 8.416305 |
| Dusp6 STC  | 0.2731                                    | 0.04036  | 1.558522 | 12956.691 | 2804.539   | 24.77691 |
| Dusp6 STC  | 0.192991                                  | 0.035295 | 1.558522 | 28632.653 | 2428.145   | 28.33272 |
| Egr1 STC1  | 9.813667                                  | 0.074994 | 57.01007 | 624857.05 | 407813.3   | 13.33448 |
| Egr1 STC2  | 8.08185                                   | 0.066611 | 57.01007 | 318911.52 | 326773.9   | 15.01252 |
| Egr2 STC1  | 1.226405                                  | 0.056423 | 0.2222   | 29859538  | 5513.549   | 17.72332 |
| Egr2 STC2  | 1.273512                                  | 0.056352 | 0.2222   | 13001435  | 5242.975   | 17.74568 |
| Ereg STC1  | 28.33946                                  | 0.005556 | 86.62286 | 394599.47 | 272265.1   | 180      |
| Ereg STC2  | 23.98453                                  | 0.005556 | 86.62286 | 394310.45 | 254071.2   | 180      |
| Fos STC1   | 2.786748                                  | 0.057162 | 12.17582 | 1422915.4 | 83302.44   | 17.49415 |
| Fos STC2   | 2.731225                                  | 0.066141 | 12.17582 | 1009602   | 84679.06   | 15.11922 |
| Fosb STC1  | 0.434245                                  | 0.027029 | 0.406141 | 4372420.9 | 2912.299   | 36.99762 |
| Fosb STC2  | 0.412392                                  | 0.028489 | 0.406141 | 2286283.6 | 2387.782   | 35.10184 |
| Gadd45g S  | 0.243612                                  | 0.096474 | 0.502496 | 188640.89 | 2686.624   | 10.36547 |
| Gadd45g S  | 0.126163                                  | 0.059156 | 0.502496 | 179604.92 | 1272.5     | 16.90446 |
| Hbegf STC  | 10.98122                                  | 0.020424 | 50.74438 | 23093.273 | 48507.47   | 48.96095 |
| Hbegf STC  | 14.48234                                  | 0.042198 | 50.74438 | 20116.35  | 51679.23   | 23.69789 |
| Id1 STC1   | 0.404496                                  | 0.052013 | 3.835974 | 25660.398 | 6673.699   | 19.22592 |
| Id1 STC2   | 0.359024                                  | 0.060429 | 3.835974 | 16666.046 | 7926.846   | 16.54825 |
| Id2 STC1   | 0.547999                                  | 0.029846 | 1.102898 | 271145.89 | 5617.094   | 33.50549 |
| Id2 STC2   | 0.583095                                  | 0.039514 | 1.102898 | 588926.91 | 7617.002   | 25.30748 |
| Id3 STC1   | 0.262372                                  | 0.045065 | 0.31131  | 426846.27 | 2028.452   | 22.19039 |
| Id3 STC2   | 0.266819                                  | 0.058987 | 0.31131  | 513415.72 | 2702.12    | 16.95296 |
| Klf9 STC1  | 1.132767                                  | 0.020435 | 99.99997 | 2694.2717 | 38583.78   | 48.93446 |
| Klf9 STC2  | 1.092296                                  | 0.018229 | 99.99997 | 5754.781  | 38824.75   | 54.85713 |
| Myc STC1   | 0.33852                                   | 0.054606 | 1.227544 | 264941.74 | 11931.56   | 18.31317 |
| Myc STC2   | 0.291501                                  | 0.047774 | 1.227544 | 425794.17 | 9493.379   | 20.93192 |
| Npas4 STC  | 0.49522                                   | 0.016452 | 12.84932 | 3420.5901 | 2185.504   | 60.78251 |
| Npas4 STC  | 0.372192                                  | 0.014533 | 12.84932 | 3590.6037 | 1950.45    | 68.80891 |
| Ptgs2 STC  | 1.243045                                  | 0.017506 | 1.369972 | 134173532 | 123936.1   | 57.12403 |
| Ptgs2 STC  | 1.731986                                  | 0.019929 | 1.369972 | 240604541 | 115264.9   | 50.17788 |
| Rgs16 STC  | 0.814378                                  | 0.036062 | 6.433388 | 2418.4377 | 2217.03    | 27.72987 |
| Rgs16 STC  | 0.343283                                  | 0.00871  | 6.433388 | 2596.1935 | 1186.365   | 114.8152 |
| Serpine1 S | 0.516                                     | 0.008119 | 0.682282 | 142388439 | 56288.92   | 123.1687 |
| Serpine1 S | 0.505808                                  | 0.008752 | 0.682282 | 295202088 | 50808.9    | 114.2648 |
| Trib1 STC1 | 1.524029                                  | 0.053825 | 10.64782 | 46150.278 | 28528.81   | 18.57875 |
| Trib1 STC2 | 1.299357                                  | 0.053923 | 10.64782 | 54683.056 | 26616.02   | 18.54486 |

Supplementary Table 1.2

|            | Delayed decay model best fit parameters |          |          |          |           |                     |          |
|------------|-----------------------------------------|----------|----------|----------|-----------|---------------------|----------|
|            | alpha                                   | lambda   | tau      | epsilon  | RSS       | Transcript lifetime |          |
| Arc STC1   | 1.071444                                | 0.036918 | 6.930377 | 6.695178 | 7868.1199 | 4586.074            | 34.01734 |
| Arc STC2   | 1.177338                                | 0.04024  | 0.99519  | 6.695178 | 8639.1782 | 4028.494            | 25.84596 |
| Btg2 STC1  | 0.261711                                | 0.249117 | 27.67087 | 0.191004 | 953760.43 | 2065.998            | 31.68506 |
| Btg2 STC2  | 0.291891                                | 1.848072 | 28.22594 | 0.191004 | 5443509.1 | 2610.12             | 28.76704 |
| Ccrn4l STC | 39.59162                                | 0.020121 | 0.327516 | 86.27389 | 246867.14 | 370819.7            | 50.02704 |
| Ccrn4l STC | 23.8529                                 | 11.55803 | 55.25475 | 86.27389 | 191006.16 | 219101.6            | 55.34127 |
| Csrnp1 STC | 3.03744                                 | 0.10104  | 13.05546 | 32.6063  | 6191.6347 | 14137.31            | 22.95253 |
| Csrnp1 STC | 2.842481                                | 1.288798 | 21.42198 | 32.6063  | 1873.8482 | 11004.2             | 22.1979  |
| Ctgf STC1  | 0.539671                                | 0.034123 | 40.76378 | 99.99997 | 27343.073 | 57350.69            | 70.06924 |
| Ctgf STC2  | 0.365666                                | 0.038087 | 51.15572 | 99.99997 | 9659.9071 | 41613.42            | 77.41125 |
| Cyr61 STC  | 1.788504                                | 0.088894 | 23.35512 | 1.341972 | 121274928 | 100933.9            | 34.60452 |
| Cyr61 STC  | 1.153555                                | 0.090365 | 30.10443 | 1.341972 | 133924361 | 69156.48            | 41.17064 |
| Dusp1 STC  | 6.166082                                | 0.480805 | 16.20483 | 19.97353 | 8252397.4 | 672982.3            | 18.28468 |
| Dusp1 STC  | 7.009078                                | 0.209647 | 10.10748 | 19.97353 | 37676792  | 965856.6            | 14.87741 |
| Dusp6 STC  | 0.195396                                | 0.049732 | 14.21079 | 1.558522 | 11749.516 | 2022.884            | 34.31843 |
| Dusp6 STC  | 0.1287                                  | 0.052641 | 22.0441  | 1.558522 | 24341.747 | 1643.174            | 41.04055 |
| Egr1 STC1  | 5.399557                                | 0.176167 | 17.5154  | 57.01007 | 436001.11 | 224384.9            | 23.19183 |
| Egr1 STC2  | 4.849104                                | 0.116123 | 15.38886 | 57.01007 | 252751.27 | 196064.6            | 24.00045 |
| Egr2 STC1  | 0.741493                                | 0.095975 | 18.07403 | 0.2222   | 20808722  | 3336.299            | 28.49344 |
| Egr2 STC2  | 0.666864                                | 0.553199 | 29.95134 | 0.2222   | 10674873  | 2748.809            | 31.75901 |
| Ereg STC1  | 23.63229                                | 0.091373 | 102.7256 | 86.62286 | 204207.81 | 227051.5            | 113.6698 |
| Ereg STC2  | 19.75986                                | 0.005582 | 498.5138 | 86.62286 | 242543.23 | 209327.8            | 677.6659 |
| Fos STC1   | 1.87799                                 | 0.081617 | 12.53039 | 12.17582 | 627537.73 | 56142.66            | 24.78268 |
| Fos STC2   | 1.666496                                | 0.106448 | 14.33286 | 12.17582 | 683272.28 | 51674.67            | 23.72708 |
| Fosb STC1  | 0.297017                                | 0.053814 | 30.10023 | 0.406141 | 1446070.3 | 1993.833            | 48.6826  |
| Fosb STC2  | 0.266607                                | 0.058457 | 32.30647 | 0.406141 | 977486.22 | 1545.514            | 49.41301 |
| Gadd45g S  | 0.144572                                | 0.135438 | 9.852819 | 0.502496 | 195375.56 | 1604.129            | 17.23629 |
| Gadd45g S  | 0.082512                                | 0.069085 | 9.338697 | 0.502496 | 187296.19 | 840.6818            | 23.81364 |
| Hbegf STC  | 9.296456                                | 0.022779 | 11.93035 | 50.74438 | 22999.799 | 41069               | 55.82997 |
| Hbegf STC  | 8.667402                                | 0.728009 | 34.83298 | 50.74438 | 15397.265 | 30937.03            | 36.20659 |
| Id1 STC1   | 0.246944                                | 0.095076 | 19.54376 | 3.835974 | 13697.949 | 4103.987            | 30.06162 |
| Id1 STC2   | 0.351985                                | 0.06054  | 0.369018 | 3.835974 | 16671.43  | 7772.852            | 16.88691 |
| Id2 STC1   | 0.543634                                | 0.029841 | 0.264209 | 1.102898 | 271155.76 | 5572.64             | 33.77558 |
| Id2 STC2   | 0.339197                                | 0.11631  | 29.89068 | 1.102898 | 500536.65 | 4447.402            | 38.48842 |
| Id3 STC1   | 0.15334                                 | 0.10537  | 24.69535 | 0.31131  | 237226.09 | 1197.025            | 34.18576 |
| Id3 STC2   | 0.14482                                 | 0.15029  | 21.95593 | 0.31131  | 445114.69 | 1480.394            | 28.60972 |
| Klf9 STC1  | 0.811019                                | 0.044625 | 33.93791 | 99.99997 | 1793.6885 | 27653.26            | 56.34689 |
| Klf9 STC2  | 0.826066                                | 0.043481 | 36.66825 | 99.99997 | 4441.0184 | 29375.75            | 59.66666 |
| Myc STC1   | 0.26722                                 | 0.057444 | 5.812246 | 1.227544 | 262368.09 | 9435.904            | 23.22052 |
| Myc STC2   | 0.246316                                | 0.048916 | 4.178563 | 1.227544 | 426314.95 | 8034.089            | 24.62157 |
| Npas4 STC  | 0.418539                                | 0.017709 | 13.73052 | 12.84932 | 3467.4986 | 1849.467            | 70.2003  |
| Npas4 STC  | 0.291585                                | 0.021791 | 28.99501 | 12.84932 | 3401.4195 | 1531.27             | 74.88643 |
| Ptgs2 STC  | 1.001012                                | 0.021314 | 19.8984  | 1.369972 | 121053158 | 99880.54            | 66.81669 |
| Ptgs2 STC  | 1.287678                                | 0.028608 | 26.86158 | 1.369972 | 199277370 | 85759.31            | 61.81624 |
| Rgs16 STC  | 0.578865                                | 0.43436  | 32.82203 | 6.433388 | 2266.2743 | 1588.113            | 35.12427 |
| Rgs16 STC  | 0.31479                                 | 0.011171 | 18.97945 | 6.433388 | 2593.1203 | 1092.718            | 108.4945 |
| Serpine1 S | 0.502031                                | 0.008138 | 3.577027 | 0.682282 | 142477494 | 54778.95            | 126.453  |
| Serpine1 S | 0.415976                                | 0.051016 | 58.0937  | 0.682282 | 239083564 | 41850.38            | 77.69537 |
| Trib1 STC1 | 0.860776                                | 0.281353 | 27.67168 | 10.64782 | 41194.894 | 16140.1             | 31.22593 |
| Trib1 STC2 | 0.650475                                | 846.7088 | 34.11696 | 10.64782 | 45312.992 | 13361.69            | 34.11814 |

Supplementary Table 2. Parameters derived for the deadenylation models. Highlighted in yellow: Egr1 model timecourse 1 is an outlier for several parameters.

|                                                                                  | Egr1          |               | Egr2          |               | Fos           |               | Fosb          |               | Ptgs2         |
|----------------------------------------------------------------------------------|---------------|---------------|---------------|---------------|---------------|---------------|---------------|---------------|---------------|
|                                                                                  | Time course 1 | Time course 2 | Time course 1 | Time course 2 | Time course 1 | Time course 2 | Time course 1 | Time course 2 | Time course 1 |
| Max decay rate<br>$k^C$<br>( $\text{min}^{-1}$ )                                 | 1.30          | 0.72          | 0.95          | 1.31          | 1.08          | 0.77          | 1.18          | 2.90          | 0.33          |
| Max deadenylation rate,<br>$k^A$ , ( $\text{min}^{-1}$ )                         | 18.30         | 11.86         | 9.14          | 7.73          | 10.48         | 7.84          | 4.79          | 3.78          | 7.32          |
| Mean decay enzyme binding length,<br>$\mu^C$ (bases)                             | 1.00          | 1.00          | 1.00          | 1.00          | 1.00          | 1.00          | 1.00          | 1.00          | 14.33         |
| Standard deviation of decay enzyme binding length,<br>$\sigma^C$<br>(bases)      | 40.30         | 18.26         | 16.51         | 11.11         | 23.56         | 18.34         | 15.06         | 13.45         | 26.73         |
| Mean deadenylation enzyme release length,<br>$\mu^A$ (bases)                     | 82.17         | 0.03          | 12.60         | 0.00          | 0.00          | 0.00          | 4.94          | 13.68         | 0.00          |
| Standard deviation of deadenylation enzyme release length,<br>$\sigma^A$ (bases) | 99.71         | 24.74         | 27.21         | 57.86         | 24.55         | 19.42         | 5.42          | 4.45          | 8.28          |
| Mean input length,<br>$\mu$ (bases)                                              | 183.55        | 185.18        | 201.71        | 187.61        | 142.65        | 155.88        | 173.29        | 153.79        | 220.47        |
| Standard deviation of input length distribution,<br>$\sigma$<br>(bases)          | 49.94         | 67.25         | 44.98         | 28.67         | 78.83         | 43.23         | 53.40         | 38.17         | 69.13         |

Supplementary Table 3. qPCR primer sequences

| Primer             | Sequence              | Amplicon size (bp) |
|--------------------|-----------------------|--------------------|
| Unspliced Fos F    | TGACCGGAATGCTTCTCTCT  | 165                |
| Unspliced Fos R    | TGTCACCGTGGGGATAAAGT  |                    |
| Spliced Fos F      | GGGACAGCCTTTCTACTACC  | 87                 |
| Spliced Fos R      | GATCTGCGCAAAAGTCCTGT  |                    |
| Unspliced Fosb F   | GGGGTCGGTGTGTGTTATGT  | 164                |
| Unspliced Fosb R   | GATCCTGGCTGGTTGTGATT  |                    |
| Spliced Fosb F     | ACCCTCCGCCGAGTCTCAGT  | 128                |
| Spliced Fosb R     | TTGCGGTGACCGTTGGCACG  |                    |
| Unspliced Egr1 F   | GGGTCTCATCGTCCAGTGAT  | 166                |
| Unspliced Egr1 R   | GAAGCGGCCAGTATAGGTGA  |                    |
| Spliced Egr1 F     | AGTGATGAACGCAAGAGGCA  | 121                |
| Spliced Egr1 R     | TAGCCACTGGGGATGGGTAA  |                    |
| Spliced Egr2 F     | GTAGCGAGGGAGTTGGGTCT  | 219                |
| Spliced Egr2 R     | ATCATGCCATCTCCCGCCAC  |                    |
| Unspliced Actb F   | AAGATCTGGCACCCACACCTT | 155                |
| Unspliced Actb R   | TGAGAAGCTGGCCAAAGAGA  |                    |
| Spliced Actb F     | CTAAGGCCAACCGTAAAAAG  | 104                |
| Spliced Actb R     | ACCAGAGGCATACAGGGACA  |                    |
| Unspliced Rpl28 F  | CATCGTGACACCTATTCCC   | 88                 |
| Unspliced Rpl28 R  | ACGGTCTTGCGGTGAATTAG  |                    |
| Spliced Rpl28 F    | TACAGCACGGAGCCAAATAA  | 74                 |
| Spliced Rpl28 R    | ACGGTCTTGCGGTGAATTAG  |                    |
| Unspliced Sqstm1 F | GCCTCTGCTGCATTTTAGCCT | 137                |
| Unspliced Sqstm1 R | GAAAAGGCAACCAAGTCCCA  |                    |
| Spliced Sqstm1 F   | CCTCTAGGCATTGAGGTTGA  | 120                |
| Spliced Sqstm1 R   | GCTTGGCTGAGTGTTACTCT  |                    |
| Cnot1 F            | AGCATAGCAGCATGTCTTCC  | 147                |
| Cnot1 R            | GCAGAACCCCTGGTCTATC   |                    |
| Malat1 F           | GTGGGTGGGGGTGTTAGGTA  | 176                |
| Malat1 R           | CAACCTTCCTTAGCTGCCCG  |                    |
| Gapdh F            | AAGAAGGTGGTGAAGCAGGC  | 114                |
| Gapdh R            | ATCGAAGGTGGAAGAGTGGG  |                    |



Table 5. RL2-PAT primer sequences

| <b>Supplementary Table 5. Sequences of PAT primers</b> |                                         |                                              |
|--------------------------------------------------------|-----------------------------------------|----------------------------------------------|
| <b>Name</b>                                            | <b>Sequence (5'→3')</b>                 | <b>Expected size of deadenylated product</b> |
| Fos 3F1                                                | CAGCGTCAATGTTTCATTGTCA                  | 280                                          |
| Fos 3F2 ('Fos PAT')                                    | CTGACATTAACAGTTTTCCATG                  | 221                                          |
| Fosb                                                   | ATTGACTCCATAGCCCTCAC                    | 184                                          |
| Egr1                                                   | AGCTGAGCTTTCGGTCTCCA                    | 314                                          |
| Egr2                                                   | GTGCTTCAATGTCAGTCCCG                    | 187                                          |
| Id1                                                    | CAGCCTCCAGAGACTTTGGG                    | 246                                          |
| Ptgs2                                                  | CCTGCTGATTGAACCTGGGA                    | 205                                          |
| Actinb1 3f1                                            | AAACTTCCGCCTTAATACTTC                   | 219                                          |
| Actinb1 3f2                                            | GGAGGATGGTCGCGTCCAT                     | 308                                          |
| Actg1 3f1                                              | ACCACCATCGGTTGTTAGTTG                   | 222                                          |
| Actg1 3f2                                              | GTTGGGAACGTTGCATCGA                     | 195                                          |
| Sqstm1 3f1                                             | AAGAGGGGACTGTCCATAGT                    | 255                                          |
| Sqstm1 3f2                                             | TTGCACCAGCAGTCCAGAAT                    | 358                                          |
| Rpl28 3f1                                              | GCCACTTCTTATGTGAGGAC                    | 254                                          |
| Rpl28 3f2                                              | TCGTGGTAGTTATGAAACGCA                   | 295                                          |
| Rps4x of1                                              | TTATTGGCAAGGGTAACAAC                    | 221                                          |
| Rps4x of2                                              | CCGGCTCTTTTGATGTGGTT                    | 296                                          |
| PAT Anchor sequence                                    | 5'-rApp GGT CAC CTT GAT CTG AAG ddC- 3' |                                              |
| PAT reverse primer (PATR1)                             | 5'-GCT TCA GAT CAA GGT GAC CTT TTT- 3'  |                                              |
